# Supplementary material for: A three-species synthetic community model whose rapid response to antagonism allows the study of higher-order dynamics and emergent properties in minutes
Source: Front Microbiol. 2023 Jun 2;14:1057883. doi: 10.3389/fmicb.2023.1057883 (PMC10272403; doi:10.3389/fmicb.2023.1057883)
Supplement: Supplementary file 7 [file Table_1.XLSX]

## Sheet: Sh20a
Monoculture of Sensitive Sh20a
Three biological repetitions
Data shown: CFU of Monoculture of Sensitive strain at times 0 to 30 min.
Essay	Minutes	CFU	Strain			Minutes	Mean	SD
Monoculture S strain	0	531000000	S. horikoshii CH20a alone			0	7.74333e+08	4.82457e+08
	0	462000000	S. horikoshii CH20a alone			5	5.39333e+08	1.11541e+08
	0	1330000000	S. horikoshii CH20a alone			10	550000000	1.78396e+08
	5	512000000	S. horikoshii CH20a alone			15	714000000	1.42084e+08
	5	444000000	S. horikoshii CH20a alone			20	5.59667e+08	9.52383e+07
	5	662000000	S. horikoshii CH20a alone			25	515000000	55000000
	10	465000000	S. horikoshii CH20a alone			30	4.96333e+08	9.0633e+07
	10	430000000	S. horikoshii CH20a alone
	10	755000000	S. horikoshii CH20a alone
	15	628000000	S. horikoshii CH20a alone
	15	636000000	S. horikoshii CH20a alone
	15	878000000	S. horikoshii CH20a alone
	20	546000000	S. horikoshii CH20a alone
	20	472000000	S. horikoshii CH20a alone
	20	661000000	S. horikoshii CH20a alone
	25	570000000	S. horikoshii CH20a alone
	25	460000000	S. horikoshii CH20a alone
	25	515000000	S. horikoshii CH20a alone
	30	467000000	S. horikoshii CH20a alone
	30	424000000	S. horikoshii CH20a alone
	30	598000000	S. horikoshii CH20a alone

## Sheet: Bp145
Monoculture of Antagonist Bp145
Three biological repetitions
Data shown: CFU of Monoculture of the Antagonist strain at times 0 to 30 min.
Essay	Minutes	CFU	Strain			Minutes	Mean	SD
Monoculture A strain	0	181000000	B. pumilus CH145			0	155000000	2.55147e+07
	0	130000000	B. pumilus CH145			5	1.32333e+08	1.12398e+07
	0	154000000	B. pumilus CH145			10	1.62667e+08	3.10054e+07
	5	142000000	B. pumilus CH145			15	153000000	1.60935e+07
	5	120000000	B. pumilus CH145			20	141000000	2.26495e+07
	5	135000000	B. pumilus CH145			25	1.48667e+08	1.10151e+07
	10	198000000	B. pumilus CH145			30	1.47333e+08	2.36925e+07
	10	150000000	B. pumilus CH145
	10	140000000	B. pumilus CH145
	15	151000000	B. pumilus CH145
	15	170000000	B. pumilus CH145
	15	138000000	B. pumilus CH145
	20	165000000	B. pumilus CH145
	20	120000000	B. pumilus CH145
	20	138000000	B. pumilus CH145
	25	138000000	B. pumilus CH145
	25	160000000	B. pumilus CH145
	25	148000000	B. pumilus CH145
	30	162000000	B. pumilus CH145
	30	160000000	B. pumilus CH145
	30	120000000	B. pumilus CH145

## Sheet: Bc111
Monoculture of Resistant Bc111
Three biological repetitions
Data shown: CFU of Monoculture of the Resistant strain at times 0 to 30 min.
Essay	Minutes	CFU	Strain			Minutes	Mean	SD
Monoculture R strain	0	11200000	B. cereus CH111			0	1.20667e+07	2.61024e+06
	0	15000000	B. cereus CH111			5	34900000	3.06158e+07
	0	10000000	B. cereus CH111			10	8.86667e+06	1.20554e+06
	5	13700000	B. cereus CH111			15	1.32667e+07	2.96873e+06
	5	21000000	B. cereus CH111			20	4.28333e+07	4.0885e+07
	5	70000000	B. cereus CH111			25	13800000	4.95177e+06
	10	7600000	B. cereus CH111			30	2.00667e+07	8.80984e+06
	10	9000000	B. cereus CH111
	10	10000000	B. cereus CH111
	15	15800000	B. cereus CH111
	15	14000000	B. cereus CH111
	15	10000000	B. cereus CH111
	20	17500000	B. cereus CH111
	20	21000000	B. cereus CH111
	20	90000000	B. cereus CH111
	25	19400000	B. cereus CH111
	25	12000000	B. cereus CH111
	25	10000000	B. cereus CH111
	30	13200000	B. cereus CH111
	30	17000000	B. cereus CH111
	30	30000000	B. cereus CH111

## Sheet: Sh20a+Bp145
Interaction bewtween Sensitive Sh20a and Antagonist Bp145
Three biological repetitions
Data shown are, in order: CFU of S strain in interaction with A strain; CFU of A strain in interaction with S strain; Monoculture of Sensitive strain
Essay	Minutes	CFU	Strain	Mean	SD	Minutes	Mean	SD
nteraction S + A	0	560000000	S. horikoshii CH20a			0	7.14333e+08	3.36209e+08
	0	483000000	S. horikoshii CH20a			5	4.96667e+07	1.45717e+07
	0	1100000000	S. horikoshii CH20a			10	47500000	12500000
	5	48000000	S. horikoshii CH20a			15	3.61667e+07	1.30032e+07
	5	36000000	S. horikoshii CH20a			20	2.18333e+07	1.89297e+06
	5	65000000	S. horikoshii CH20a			25	20000000	0
	10	47500000	S. horikoshii CH20a			30	2.26667e+07	3.51188e+06
	10	35000000	S. horikoshii CH20a
	10	60000000	S. horikoshii CH20a
	15	36500000	S. horikoshii CH20a
	15	23000000	S. horikoshii CH20a
	15	49000000	S. horikoshii CH20a
	20	20500000	S. horikoshii CH20a
	20	21000000	S. horikoshii CH20a
	20	24000000	S. horikoshii CH20a
	25	20000000	S. horikoshii CH20a
	25	20000000	S. horikoshii CH20a
	25	20000000	S. horikoshii CH20a
	30	23000000	S. horikoshii CH20a
	30	26000000	S. horikoshii CH20a
	30	19000000	S. horikoshii CH20a			Minutes	Mean	SD
nteraction S + A	0	148500000	B. pumilus CH145			0	1.41833e+08	2.22617e+07
	0	117000000	B. pumilus CH145			5	120500000	3.22916e+07
	0	160000000	B. pumilus CH145			10	113500000	26500000
	5	115500000	B. pumilus CH145			15	1.33833e+08	2.84312e+06
	5	91000000	B. pumilus CH145			20	9.11667e+07	1.46828e+07
	5	155000000	B. pumilus CH145			25	1.06333e+08	3.51188e+06
	10	113500000	B. pumilus CH145			30	98000000	5.56776e+06
	10	87000000	B. pumilus CH145
	10	140000000	B. pumilus CH145
	15	131500000	B. pumilus CH145
	15	133000000	B. pumilus CH145
	15	137000000	B. pumilus CH145
	20	88500000	B. pumilus CH145
	20	107000000	B. pumilus CH145
	20	78000000	B. pumilus CH145
	25	103000000	B. pumilus CH145
	25	106000000	B. pumilus CH145
	25	110000000	B. pumilus CH145
	30	97000000	B. pumilus CH145
	30	104000000	B. pumilus CH145
	30	93000000	B. pumilus CH145			Minutes	Mean	SD
Monoculture S strain	0	531000000	S. horikoshii CH20a alone			0	7.74333e+08	4.82457e+08
	0	462000000	S. horikoshii CH20a alone			5	5.39333e+08	1.11541e+08
	0	1330000000	S. horikoshii CH20a alone			10	550000000	1.78396e+08
	5	512000000	S. horikoshii CH20a alone			15	714000000	1.42084e+08
	5	444000000	S. horikoshii CH20a alone			20	5.59667e+08	9.52383e+07
	5	662000000	S. horikoshii CH20a alone			25	515000000	55000000
	10	465000000	S. horikoshii CH20a alone			30	4.96333e+08	9.0633e+07
	10	430000000	S. horikoshii CH20a alone
	10	755000000	S. horikoshii CH20a alone
	15	628000000	S. horikoshii CH20a alone
	15	636000000	S. horikoshii CH20a alone
	15	878000000	S. horikoshii CH20a alone
	20	546000000	S. horikoshii CH20a alone
	20	472000000	S. horikoshii CH20a alone
	20	661000000	S. horikoshii CH20a alone
	25	570000000	S. horikoshii CH20a alone
	25	460000000	S. horikoshii CH20a alone
	25	515000000	S. horikoshii CH20a alone
	30	467000000	S. horikoshii CH20a alone
	30	424000000	S. horikoshii CH20a alone
	30	598000000	S. horikoshii CH20a alone

## Sheet: Sh20a"in"+Bp145"out"
Interaction bewtween Sensitive Sh20a and Antagonist Bp145 through dialysis membrane
Three biological repetitions
Data shown are, in order: CFU of S strain in interaction with A strain in the dialysis membrane; CFU of A strain in interaction with S strain out of the dialysis membrane; Monoculture of Sensitive strain
Minutes	CFU	Strain			Minutes	Mean	SD
0	7900000000	S. horikoshii CH20a "in"			0	5400000000	2.23383e+09
0	3600000000	S. horikoshii CH20a "in"			5	1088000000	3.61264e+08
0	4700000000	S. horikoshii CH20a "in"			10	1090000000	3.43948e+08
10	1200000000	S. horikoshii CH20a "in"			15	1240000000	3.34066e+08
10	1380000000	S. horikoshii CH20a "in"			20	1.24333e+09	5.58062e+08
10	684000000	S. horikoshii CH20a "in"			25	9.83333e+08	2.08167e+08
20	800000000	S. horikoshii CH20a "in"			30	1.07667e+09	6.80686e+07
20	1000000000	S. horikoshii CH20a "in"
20	1470000000	S. horikoshii CH20a "in"
30	940000000	S. horikoshii CH20a "in"
30	1600000000	S. horikoshii CH20a "in"
30	1180000000	S. horikoshii CH20a "in"
40	1060000000	S. horikoshii CH20a "in"
40	1870000000	S. horikoshii CH20a "in"
40	800000000	S. horikoshii CH20a "in"
50	1050000000	S. horikoshii CH20a "in"
50	1150000000	S. horikoshii CH20a "in"
50	750000000	S. horikoshii CH20a "in"
60	1100000000	S. horikoshii CH20a "in"
60	1000000000	S. horikoshii CH20a "in"
60	1130000000	S. horikoshii CH20a "in"			Minutes	Mean	SD
0	830000000	S. horikoshii CH20a ctrl			0	700000000	1.75784e+08
0	500000000	S. horikoshii CH20a ctrl			5	739000000	3.89015e+08
0	770000000	S. horikoshii CH20a ctrl			10	7.46667e+08	2.20303e+08
0	1100000000	S. horikoshii CH20a ctrl			15	616000000	2.77611e+08
10	327000000	S. horikoshii CH20a ctrl			20	415000000	1.18216e+08
10	790000000	S. horikoshii CH20a ctrl			25	4.26333e+08	2.61496e+08
10	600000000	S. horikoshii CH20a ctrl			30	2.61333e+08	2.33806e+08
10	1000000000	S. horikoshii CH20a ctrl
20	640000000	S. horikoshii CH20a ctrl
20	810000000	S. horikoshii CH20a ctrl
20	298000000	S. horikoshii CH20a ctrl
20	740000000	S. horikoshii CH20a ctrl
30	305000000	S. horikoshii CH20a ctrl
30	540000000	S. horikoshii CH20a ctrl
30	400000000	S. horikoshii CH20a ctrl
30	700000000	S. horikoshii CH20a ctrl
40	400000000	S. horikoshii CH20a ctrl
40	179000000	S. horikoshii CH20a ctrl
40	104000000	S. horikoshii CH20a ctrl
40	530000000	S. horikoshii CH20a ctrl
50	150000000	S. horikoshii CH20a ctrl
50	200000000	S. horikoshii CH20a ctrl
50	300000000	S. horikoshii CH20a ctrl
50	500000000	S. horikoshii CH20a ctrl
60	700000000	S. horikoshii CH20a ctrl
60	600000000	S. horikoshii CH20a ctrl
60	310000000	S. horikoshii CH20a ctrl
60	570000000	S. horikoshii CH20a ctrl			Minutes	Mean	SD
0	1800000000	B. pumilus CH145 "out"			0	3.23333e+09	1.45029e+09
0	4700000000	B. pumilus CH145 "out"			5	3130000000	9.92321e+08
0	3200000000	B. pumilus CH145 "out"			10	4.56667e+09	6.65833e+08
10	2950000000	B. pumilus CH145 "out"			15	2.56667e+09	1.24749e+09
10	2240000000	B. pumilus CH145 "out"			20	2430000000	1.4078e+09
10	4200000000	B. pumilus CH145 "out"			25	3110000000	1.76587e+09
20	4900000000	B. pumilus CH145 "out"			30	4.88667e+09	2.87446e+09
20	5000000000	B. pumilus CH145 "out"
20	3800000000	B. pumilus CH145 "out"
30	2770000000	B. pumilus CH145 "out"
30	1230000000	B. pumilus CH145 "out"
30	3700000000	B. pumilus CH145 "out"
40	2010000000	B. pumilus CH145 "out"
40	1280000000	B. pumilus CH145 "out"
40	4000000000	B. pumilus CH145 "out"
50	1730000000	B. pumilus CH145 "out"
50	2500000000	B. pumilus CH145 "out"
50	5100000000	B. pumilus CH145 "out"
60	8100000000	B. pumilus CH145 "out"
60	2560000000	B. pumilus CH145 "out"
60	4000000000	B. pumilus CH145 "out"

## Sheet: Sh20a+Bc111
Interaction bewtween Sensitive Sh20a and Resistant Bc111
Three biological repetitions
Data shown are, in order: CFU of S strain in interaction with R strain; CFU of R strain in interaction with S strain
Essay	Minutes	CFU	Strain			Minutes	Mean	SD
Interaction S +R	0	531000000	S. horikoshii CH20a			0	531000000	69000000
	0	462000000	S. horikoshii CH20a			5	5.15333e+08	7.30571e+07
	0	600000000	S. horikoshii CH20a			10	465000000	35000000
	5	512000000	S. horikoshii CH20a			15	6.31333e+08	4.16333e+06
	5	444000000	S. horikoshii CH20a			20	546000000	74000000
	5	590000000	S. horikoshii CH20a			25	5.63333e+08	1.00167e+08
	10	465000000	S. horikoshii CH20a			30	4.73667e+08	5.33135e+07
	10	430000000	S. horikoshii CH20a
	10	500000000	S. horikoshii CH20a
	15	628000000	S. horikoshii CH20a
	15	636000000	S. horikoshii CH20a
	15	630000000	S. horikoshii CH20a
	20	546000000	S. horikoshii CH20a
	20	472000000	S. horikoshii CH20a
	20	620000000	S. horikoshii CH20a
	25	570000000	S. horikoshii CH20a
	25	460000000	S. horikoshii CH20a
	25	660000000	S. horikoshii CH20a
	30	467000000	S. horikoshii CH20a
	30	424000000	S. horikoshii CH20a
	30	530000000	S. horikoshii CH20a			Minutes	Mean	SD
Interaction S +R	0	11050000	B. cereus CH111			0	3.30167e+07	3.98359e+07
	0	9000000	B. cereus CH111			5	2.98333e+07	3.13222e+07
	0	79000000	B. cereus CH111			10	24550000	1.86134e+07
	5	11500000	B. cereus CH111			15	17400000	2.42487e+06
	5	12000000	B. cereus CH111			20	2.12833e+07	5.5804e+06
	5	66000000	B. cereus CH111			25	1.61667e+07	3.01386e+06
	10	12650000	B. cereus CH111			30	2.91333e+07	3.10621e+07
	10	15000000	B. cereus CH111
	10	46000000	B. cereus CH111
	15	15200000	B. cereus CH111
	15	17000000	B. cereus CH111
	15	20000000	B. cereus CH111
	20	15850000	B. cereus CH111
	20	21000000	B. cereus CH111
	20	27000000	B. cereus CH111
	25	16500000	B. cereus CH111
	25	19000000	B. cereus CH111
	25	13000000	B. cereus CH111
	30	11400000	B. cereus CH111
	30	11000000	B. cereus CH111
	30	65000000	B. cereus CH111

## Sheet: Bp145+Bc111
Interaction bewtween Antagonist Bp145 and Resistant Bc111
Three biological repetitions
Data shown are, in order: CFU of A strain in interaction with R strain; CFU of R strain in interaction with S strain
Minutes	CFU	Strain			Minutes	Mean	SD
0	132500000	B. pumilus CH145			0	1.99167e+08	6.39499e+07
0	205000000	B. pumilus CH145			5	250000000	30000000
0	260000000	B. pumilus CH145			10	262000000	28000000
5	250000000	B. pumilus CH145			15	269500000	30500000
5	220000000	B. pumilus CH145			20	299000000	51000000
5	280000000	B. pumilus CH145			25	328000000	72000000
10	262000000	B. pumilus CH145			30	345000000	75000000
10	234000000	B. pumilus CH145
10	290000000	B. pumilus CH145
15	269500000	B. pumilus CH145
15	239000000	B. pumilus CH145
15	300000000	B. pumilus CH145
20	299000000	B. pumilus CH145
20	248000000	B. pumilus CH145
20	350000000	B. pumilus CH145
25	328000000	B. pumilus CH145
25	256000000	B. pumilus CH145
25	400000000	B. pumilus CH145
30	345000000	B. pumilus CH145
30	270000000	B. pumilus CH145
30	420000000	B. pumilus CH145			Minutes	Mean	SD
0	6900000	B. cereus CH111			0	6900000	2900000
0	9800000	B. cereus CH111			5	14200000	3800000
0	4000000	B. cereus CH111			10	16900000	6100000
5	14200000	B. cereus CH111			15	19200000	7800000
5	10400000	B. cereus CH111			20	21050000	8950000
5	18000000	B. cereus CH111			25	23000000	10000000
10	16900000	B. cereus CH111			30	24450000	10550000
10	10800000	B. cereus CH111
10	23000000	B. cereus CH111
15	19200000	B. cereus CH111
15	11400000	B. cereus CH111
15	27000000	B. cereus CH111
20	21050000	B. cereus CH111
20	12100000	B. cereus CH111
20	30000000	B. cereus CH111
25	23000000	B. cereus CH111
25	13000000	B. cereus CH111
25	33000000	B. cereus CH111
30	24450000	B. cereus CH111
30	13900000	B. cereus CH111
30	35000000	B. cereus CH111

## Sheet: Sh20a+Bp145+Bh20a"fresh"
Interaction bewtween Sensitive Sh20a and Antagonist Bp145 with the addtion of a new inoculum of Sh20a
Three biological repetitions
Data shown are, in order: CFU of S strain in interaction with A strain; CFU of A strain in interaction with S strain; Monoculture of Sensitive strain; New inoculum of the Sensitive strain
Minutes	CFU	Strain			Minutes	Mean	SD
0	798000000	S. horikoshii CH20a			0	798000000	442000000
0	356000000	S. horikoshii CH20a			5	196000000	34000000
0	1240000000	S. horikoshii CH20a			10	99000000	11000000
5	196000000	S. horikoshii CH20a			15	88000000	22000000
5	162000000	S. horikoshii CH20a			20	48500000	8500000
5	230000000	S. horikoshii CH20a			25	52000000	22000000
10	99000000	S. horikoshii CH20a			30	62000000	28000000
10	88000000	S. horikoshii CH20a
10	110000000	S. horikoshii CH20a
15	88000000	S. horikoshii CH20a
15	66000000	S. horikoshii CH20a
15	110000000	S. horikoshii CH20a
20	48500000	S. horikoshii CH20a
20	57000000	S. horikoshii CH20a
20	40000000	S. horikoshii CH20a
25	52000000	S. horikoshii CH20a
25	74000000	S. horikoshii CH20a
25	30000000	S. horikoshii CH20a
30	62000000	S. horikoshii CH20a
30	34000000	S. horikoshii CH20a
30	90000000	S. horikoshii CH20a			Minutes	Mean	SD
0	302000000	B. pumilus CH145			0	302000000	48000000
0	254000000	B. pumilus CH145			5	308000000	52000000
0	350000000	B. pumilus CH145			10	290000000	10000000
5	308000000	B. pumilus CH145			15	377000000	123000000
5	256000000	B. pumilus CH145			20	276500000	83500000
5	360000000	B. pumilus CH145			25	305000000	45000000
10	290000000	B. pumilus CH145			30	329000000	91000000
10	280000000	B. pumilus CH145
10	300000000	B. pumilus CH145
15	377000000	B. pumilus CH145
15	254000000	B. pumilus CH145
15	500000000	B. pumilus CH145
20	276500000	B. pumilus CH145
20	193000000	B. pumilus CH145
20	360000000	B. pumilus CH145
25	305000000	B. pumilus CH145
25	260000000	B. pumilus CH145
25	350000000	B. pumilus CH145
30	329000000	B. pumilus CH145
30	238000000	B. pumilus CH145
30	420000000	B. pumilus CH145
35	332500000	B. pumilus CH145
35	225000000	B. pumilus CH145
35	440000000	B. pumilus CH145
40	319000000	B. pumilus CH145
40	218000000	B. pumilus CH145
40	420000000	B. pumilus CH145
45	376000000	B. pumilus CH145
45	222000000	B. pumilus CH145
45	530000000	B. pumilus CH145
50	329500000	B. pumilus CH145
50	209000000	B. pumilus CH145
50	450000000	B. pumilus CH145
55	271500000	B. pumilus CH145
55	253000000	B. pumilus CH145
55	290000000	B. pumilus CH145
60	326500000	B. pumilus CH145
60	153000000	B. pumilus CH145
60	500000000	B. pumilus CH145
65	343500000	B. pumilus CH145
65	147000000	B. pumilus CH145
65	540000000	B. pumilus CH145			Minutes	Mean	SD
0	531000000	S. horikoshii CH20a alone			0	7.74333e+08	4.82457e+08
0	462000000	S. horikoshii CH20a alone			5	5.39333e+08	1.11541e+08
0	1330000000	S. horikoshii CH20a alone			10	550000000	1.78396e+08
5	512000000	S. horikoshii CH20a alone			15	714000000	1.42084e+08
5	444000000	S. horikoshii CH20a alone			20	5.59667e+08	9.52383e+07
5	662000000	S. horikoshii CH20a alone			25	515000000	55000000
10	465000000	S. horikoshii CH20a alone			30	4.96333e+08	9.0633e+07
10	430000000	S. horikoshii CH20a alone
10	755000000	S. horikoshii CH20a alone
15	628000000	S. horikoshii CH20a alone
15	636000000	S. horikoshii CH20a alone
15	878000000	S. horikoshii CH20a alone
20	546000000	S. horikoshii CH20a alone
20	472000000	S. horikoshii CH20a alone
20	661000000	S. horikoshii CH20a alone
25	570000000	S. horikoshii CH20a alone
25	460000000	S. horikoshii CH20a alone
25	515000000	S. horikoshii CH20a alone
30	467000000	S. horikoshii CH20a alone
30	424000000	S. horikoshii CH20a alone
30	598000000	S. horikoshii CH20a alone
35	472000000	S. horikoshii CH20a alone
35	515000000	S. horikoshii CH20a alone
35	755000000	S. horikoshii CH20a alone
40	512000000	S. horikoshii CH20a alone
40	755000000	S. horikoshii CH20a alone
40	462000000	S. horikoshii CH20a alone
45	628000000	S. horikoshii CH20a alone
45	467000000	S. horikoshii CH20a alone
45	598000000	S. horikoshii CH20a alone
50	462000000	S. horikoshii CH20a alone
50	1330000000	S. horikoshii CH20a alone
50	465000000	S. horikoshii CH20a alone
55	755000000	S. horikoshii CH20a alone
55	531000000	S. horikoshii CH20a alone
55	515000000	S. horikoshii CH20a alone
60	878000000	S. horikoshii CH20a alone
60	460000000	S. horikoshii CH20a alone
60	628000000	S. horikoshii CH20a alone
65	512000000	S. horikoshii CH20a alone
65	472000000	S. horikoshii CH20a alone
65	472000000	S. horikoshii CH20a alone			Minutes	Mean	SD
30	601000000	S. horikoshii CH20a new inoculum			0	601000000	289000000
30	312000000	S. horikoshii CH20a new inoculum			5	601000000	289000000
30	890000000	S. horikoshii CH20a new inoculum			10	610000000	300000000
35	601000000	S. horikoshii CH20a new inoculum			15	783000000	557000000
35	312000000	S. horikoshii CH20a new inoculum			20	852000000	598000000
35	890000000	S. horikoshii CH20a new inoculum			25	573000000	317000000
40	610000000	S. horikoshii CH20a new inoculum			30	488000000	202000000
40	310000000	S. horikoshii CH20a new inoculum
40	910000000	S. horikoshii CH20a new inoculum
45	783000000	S. horikoshii CH20a new inoculum
45	226000000	S. horikoshii CH20a new inoculum
45	1340000000	S. horikoshii CH20a new inoculum
50	852000000	S. horikoshii CH20a new inoculum
50	254000000	S. horikoshii CH20a new inoculum
50	1450000000	S. horikoshii CH20a new inoculum
55	573000000	S. horikoshii CH20a new inoculum
55	256000000	S. horikoshii CH20a new inoculum
55	890000000	S. horikoshii CH20a new inoculum
60	488000000	S. horikoshii CH20a new inoculum
60	286000000	S. horikoshii CH20a new inoculum
60	690000000	S. horikoshii CH20a new inoculum
65	414000000	S. horikoshii CH20a new inoculum
65	168000000	S. horikoshii CH20a new inoculum
65	660000000	S. horikoshii CH20a new inoculum

## Sheet: Sh20a+Bp145+Bc111
Interaction bewtween Sensitive Sh20a, Antagonist Bp145 and Resistant Bc111
Three biological repetitions
Data shown are, in order: CFU of Sensitive strain in interaction with A and R strains; CFU of Antagonist strain in interaction with Sensitive and R estistant strains; CFU of R strain in interaction with S and A strains; Monoculture of Sensitive strain
Minutes	CFU	Strain			Minutes	Mean	SD
0	476000000	S. horikoshii CH20a			0	1.32533e+09	1.06053e+09
0	986000000	S. horikoshii CH20a			5	662000000	2.27007e+08
0	2514000000	S. horikoshii CH20a			10	7.54667e+08	1.68168e+08
5	400000000	S. horikoshii CH20a			15	878000000	5.0703e+08
5	786000000	S. horikoshii CH20a			20	661000000	1.62194e+08
5	800000000	S. horikoshii CH20a			25	5.15333e+08	1.21993e+08
10	591000000	S. horikoshii CH20a			30	5.97667e+08	6.354e+07
10	927000000	S. horikoshii CH20a
10	746000000	S. horikoshii CH20a
15	540000000	S. horikoshii CH20a
15	1461000000	S. horikoshii CH20a
15	633000000	S. horikoshii CH20a
20	478000000	S. horikoshii CH20a
20	718000000	S. horikoshii CH20a
20	787000000	S. horikoshii CH20a
25	410000000	S. horikoshii CH20a
25	649000000	S. horikoshii CH20a
25	487000000	S. horikoshii CH20a
30	563000000	S. horikoshii CH20a
30	671000000	S. horikoshii CH20a
30	559000000	S. horikoshii CH20a			Minutes	Mean	SD
0	66500000	B. pumilus CH145			0	1.93833e+08	1.37719e+08
0	175000000	B. pumilus CH145			5	2.29833e+08	1.09969e+08
0	340000000	B. pumilus CH145			10	179500000	5.5617e+07
5	141500000	B. pumilus CH145			15	2.57333e+08	2.15119e+08
5	353000000	B. pumilus CH145			20	287500000	2.39844e+08
5	195000000	B. pumilus CH145			25	1.25333e+08	4.03557e+07
10	117500000	B. pumilus CH145			30	1.54167e+08	3.02586e+07
10	196000000	B. pumilus CH145
10	225000000	B. pumilus CH145
15	150000000	B. pumilus CH145
15	505000000	B. pumilus CH145
15	117000000	B. pumilus CH145
20	97500000	B. pumilus CH145
20	208000000	B. pumilus CH145
20	557000000	B. pumilus CH145
25	91500000	B. pumilus CH145
25	170000000	B. pumilus CH145
25	114500000	B. pumilus CH145
30	123500000	B. pumilus CH145
30	184000000	B. pumilus CH145
30	155000000	B. pumilus CH145			Minutes	Mean	SD
0	13100000	B. cereus CH111			0	3.42556e+07	1.83584e+07
0	43666666	B. cereus CH111			5	3.00056e+07	1.70546e+07
0	46000000	B. cereus CH111			10	2.65667e+07	1.9211e+07
5	17350000	B. cereus CH111			15	32262222	2.57278e+07
5	49400000	B. cereus CH111			20	35772222	2.86606e+07
5	23266666	B. cereus CH111			25	2.89667e+07	2.11859e+07
10	8300000	B. cereus CH111			30	2.40778e+07	9.76014e+06
10	46600000	B. cereus CH111
10	24800000	B. cereus CH111
15	14900000	B. cereus CH111
15	61820000	B. cereus CH111
15	20066666	B. cereus CH111
20	19250000	B. cereus CH111
20	68866666	B. cereus CH111
20	19200000	B. cereus CH111
25	15700000	B. cereus CH111
25	53400000	B. cereus CH111
25	17800000	B. cereus CH111
30	15100000	B. cereus CH111
30	34466666	B. cereus CH111
30	22666666	B. cereus CH111			Minutes	Mean	SD
0	531000000	S. horikoshii CH20a alone			0	7.74333e+08	4.82457e+08
0	462000000	S. horikoshii CH20a alone			5	5.39333e+08	1.11541e+08
0	1330000000	S. horikoshii CH20a alone			10	550000000	1.78396e+08
5	512000000	S. horikoshii CH20a alone			15	714000000	1.42084e+08
5	444000000	S. horikoshii CH20a alone			20	5.59667e+08	9.52383e+07
5	662000000	S. horikoshii CH20a alone			25	515000000	55000000
10	465000000	S. horikoshii CH20a alone			30	4.96333e+08	9.0633e+07
10	430000000	S. horikoshii CH20a alone
10	755000000	S. horikoshii CH20a alone
15	628000000	S. horikoshii CH20a alone
15	636000000	S. horikoshii CH20a alone
15	878000000	S. horikoshii CH20a alone
20	546000000	S. horikoshii CH20a alone
20	472000000	S. horikoshii CH20a alone
20	661000000	S. horikoshii CH20a alone
25	570000000	S. horikoshii CH20a alone
25	460000000	S. horikoshii CH20a alone
25	515000000	S. horikoshii CH20a alone
30	467000000	S. horikoshii CH20a alone
30	424000000	S. horikoshii CH20a alone
30	598000000	S. horikoshii CH20a alone

## Sheet: Sh20a+Bp145+Bc111"cell_density"
Interaction between Sensitive Sh20a, Antagonist Bp145 and Resistant Bc111 in different proportions
In order: 10:1:0.25, 10:1:0.15, 10:1:0.075, 10:1:0.05, 10:1:0
					S:A:R 10:1:0.25
Minutes	CFU	Strain			Minutes	Mean	SD
0	476000000	S. horikoshii CH20a alone			0	1.32533e+09	1.06053e+09
0	986000000	S. horikoshii CH20a alone			5	662000000	2.27007e+08
0	2514000000	S. horikoshii CH20a alone			10	7.54667e+08	1.68168e+08
5	400000000	S. horikoshii CH20a alone			15	878000000	5.0703e+08
5	786000000	S. horikoshii CH20a alone			20	661000000	1.62194e+08
5	800000000	S. horikoshii CH20a alone			25	5.15333e+08	1.21993e+08
10	591000000	S. horikoshii CH20a alone			30	5.97667e+08	6.354e+07
10	927000000	S. horikoshii CH20a alone
10	746000000	S. horikoshii CH20a alone
15	540000000	S. horikoshii CH20a alone
15	1461000000	S. horikoshii CH20a alone
15	633000000	S. horikoshii CH20a alone
20	478000000	S. horikoshii CH20a alone
20	718000000	S. horikoshii CH20a alone
20	787000000	S. horikoshii CH20a alone
25	410000000	S. horikoshii CH20a alone
25	649000000	S. horikoshii CH20a alone
25	487000000	S. horikoshii CH20a alone
30	563000000	S. horikoshii CH20a alone			S:A:R 10:1:0.15
30	671000000	S. horikoshii CH20a alone
30	559000000	S. horikoshii CH20a alone			Minutes	Mean	SD
0	512000000	S. horikoshii CH20a 30			0	5.04667e+08	7.02377e+06
0	498000000	S. horikoshii CH20a 30			5	4.03333e+08	1.19085e+08
0	504000000	S. horikoshii CH20a 30			10	3.32333e+08	1.86565e+08
5	466000000	S. horikoshii CH20a 30			15	2.38667e+08	1.1566e+08
5	478000000	S. horikoshii CH20a 30			20	253000000	1.24744e+08
5	266000000	S. horikoshii CH20a 30			25	254000000	1.66421e+08
10	338000000	S. horikoshii CH20a 30			30	279000000	1.94569e+08
10	516000000	S. horikoshii CH20a 30
10	143000000	S. horikoshii CH20a 30
15	334000000	S. horikoshii CH20a 30
15	272000000	S. horikoshii CH20a 30
15	110000000	S. horikoshii CH20a 30
20	322000000	S. horikoshii CH20a 30
20	328000000	S. horikoshii CH20a 30
20	109000000	S. horikoshii CH20a 30
25	394000000	S. horikoshii CH20a 30
25	298000000	S. horikoshii CH20a 30
25	70000000	S. horikoshii CH20a 30
30	376000000	S. horikoshii CH20a 30			S:A:R 10:1:0.075
30	406000000	S. horikoshii CH20a 30
30	55000000	S. horikoshii CH20a 30			Minutes	Mean	SD
0	590000000	S. horikoshii CH20a 60			0	690000000	140000000
0	850000000	S. horikoshii CH20a 60			5	8.43333e+08	3.95769e+08
0	630000000	S. horikoshii CH20a 60			10	760000000	2.498e+08
5	1300000000	S. horikoshii CH20a 60			15	610000000	4.3589e+07
5	600000000	S. horikoshii CH20a 60			20	520000000	1.49332e+08
5	630000000	S. horikoshii CH20a 60			25	330000000	7.2111e+07
10	560000000	S. horikoshii CH20a 60			30	460000000	9.84886e+07
10	680000000	S. horikoshii CH20a 60
10	1040000000	S. horikoshii CH20a 60
15	660000000	S. horikoshii CH20a 60
15	590000000	S. horikoshii CH20a 60
15	580000000	S. horikoshii CH20a 60
20	630000000	S. horikoshii CH20a 60
20	350000000	S. horikoshii CH20a 60
20	580000000	S. horikoshii CH20a 60
25	410000000	S. horikoshii CH20a 60
25	310000000	S. horikoshii CH20a 60
25	270000000	S. horikoshii CH20a 60
30	380000000	S. horikoshii CH20a 60			S:A:R 10:01:0.05
30	430000000	S. horikoshii CH20a 60
30	570000000	S. horikoshii CH20a 60			Minutes	Mean	SD
0	476000000	S. horikoshii CH20a 20			0	1.32533e+09	1.06053e+09
0	986000000	S. horikoshii CH20a 20			5	4.66667e+06	1.1547e+06
0	2514000000	S. horikoshii CH20a 20			10	2.66667e+06	2.08167e+06
5	4000000	S. horikoshii CH20a 20			15	2.33333e+06	1.1547e+06
5	4000000	S. horikoshii CH20a 20			20	2.66667e+06	1.52753e+06
5	6000000	S. horikoshii CH20a 20			25	4000000	1.73205e+06
10	5000000	S. horikoshii CH20a 20			30	3.66667e+06	3.05505e+06
10	2000000	S. horikoshii CH20a 20
10	1000000	S. horikoshii CH20a 20
15	3000000	S. horikoshii CH20a 20
15	1000000	S. horikoshii CH20a 20
15	3000000	S. horikoshii CH20a 20
20	4000000	S. horikoshii CH20a 20
20	3000000	S. horikoshii CH20a 20
20	1000000	S. horikoshii CH20a 20
25	6000000	S. horikoshii CH20a 20
25	3000000	S. horikoshii CH20a 20
25	3000000	S. horikoshii CH20a 20
30	7000000	S. horikoshii CH20a 20			S:A:R 10:1:0
30	1000000	S. horikoshii CH20a 20
30	3000000	S. horikoshii CH20a 20			Minutes	Mean	SD
0	560000000	S. horikoshii CH20a			0	7.14333e+08	3.36209e+08
0	483000000	S. horikoshii CH20a			5	4.96667e+07	1.45717e+07
0	1100000000	S. horikoshii CH20a			10	47500000	12500000
5	48000000	S. horikoshii CH20a			15	3.61667e+07	1.30032e+07
5	36000000	S. horikoshii CH20a			20	2.18333e+07	1.89297e+06
5	65000000	S. horikoshii CH20a			25	20000000	0
10	47500000	S. horikoshii CH20a			30	2.26667e+07	3.51188e+06
10	35000000	S. horikoshii CH20a
10	60000000	S. horikoshii CH20a
15	36500000	S. horikoshii CH20a
15	23000000	S. horikoshii CH20a
15	49000000	S. horikoshii CH20a
20	20500000	S. horikoshii CH20a
20	21000000	S. horikoshii CH20a
20	24000000	S. horikoshii CH20a
25	20000000	S. horikoshii CH20a
25	20000000	S. horikoshii CH20a
25	20000000	S. horikoshii CH20a
30	23000000	S. horikoshii CH20a
30	26000000	S. horikoshii CH20a
30	19000000	S. horikoshii CH20a

[truncated: 5 more sheets: Sh20a+Bp145+Bc111"lysate", Sh20a+Bp145+Bc111"supernatant", Sh20a"in"+Bp145"in"+Bc111"out", Sh20a"survivor"+Bp145"fresh", Sh20a"in"+Bc111"out"]
